# Supplementary material for: Using decision trees to understand structure in missing data
Source: HighWire-hosted journal article supplement (doi:10.1136/bmjopen-2014-007450), 2015-06-01
Supplement: bmjopen-2014-007450supp.pdf [file bmjopen-2014-007450supp.pdf]

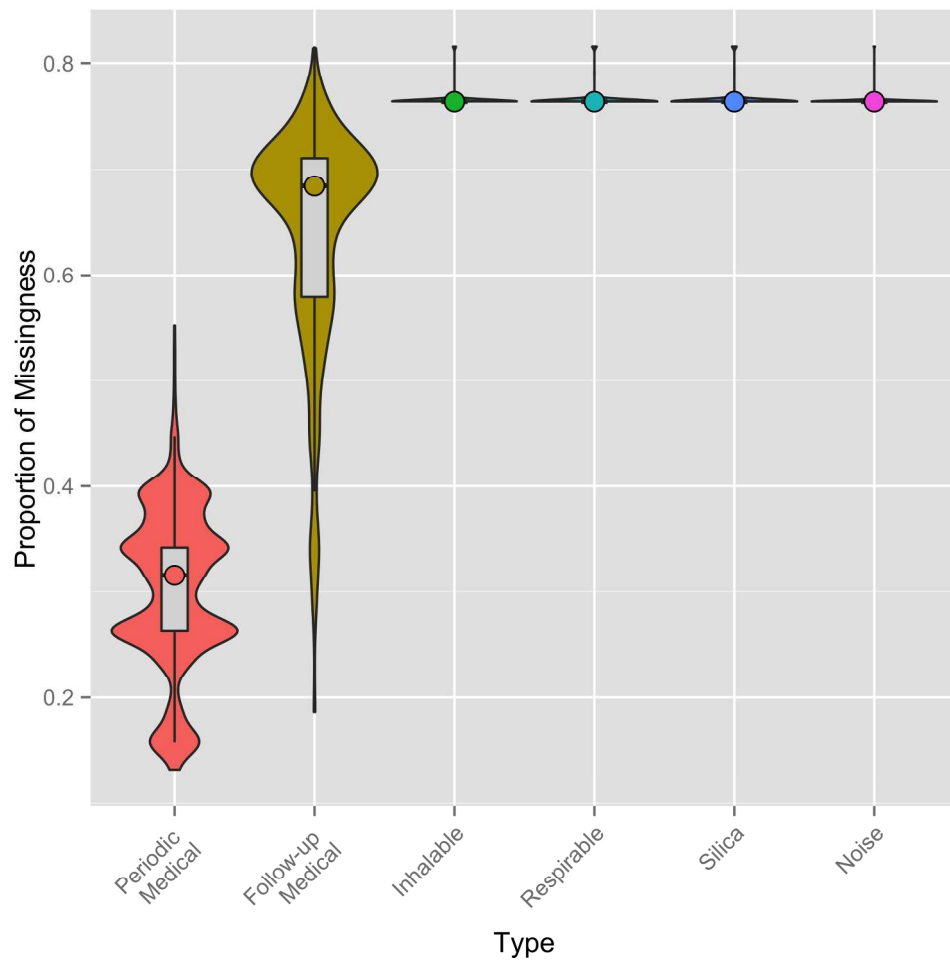

Supplementary Figure 1. Proportion of missing data per row based on the different data Types.

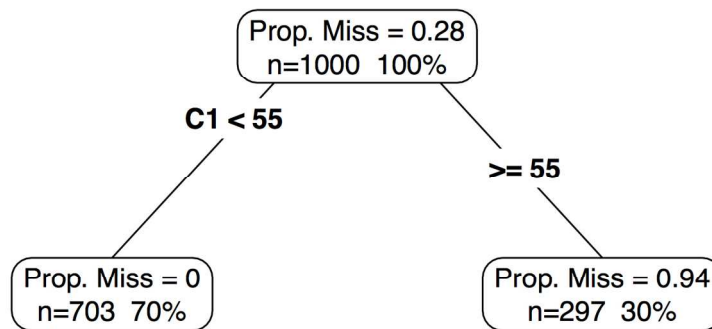

Supplementary Figure 2. Illustrative CART model based on the simulated data in the simulation study. The three numbers in each oval indicate the expected proportion of missing data (Prop. Miss) per row of data, the number of rows (n) and the percentage of total data (n%) in that node. All CART plots and summaries for conditions 1A and 1B can be extracted from the code provided in supplementary material.

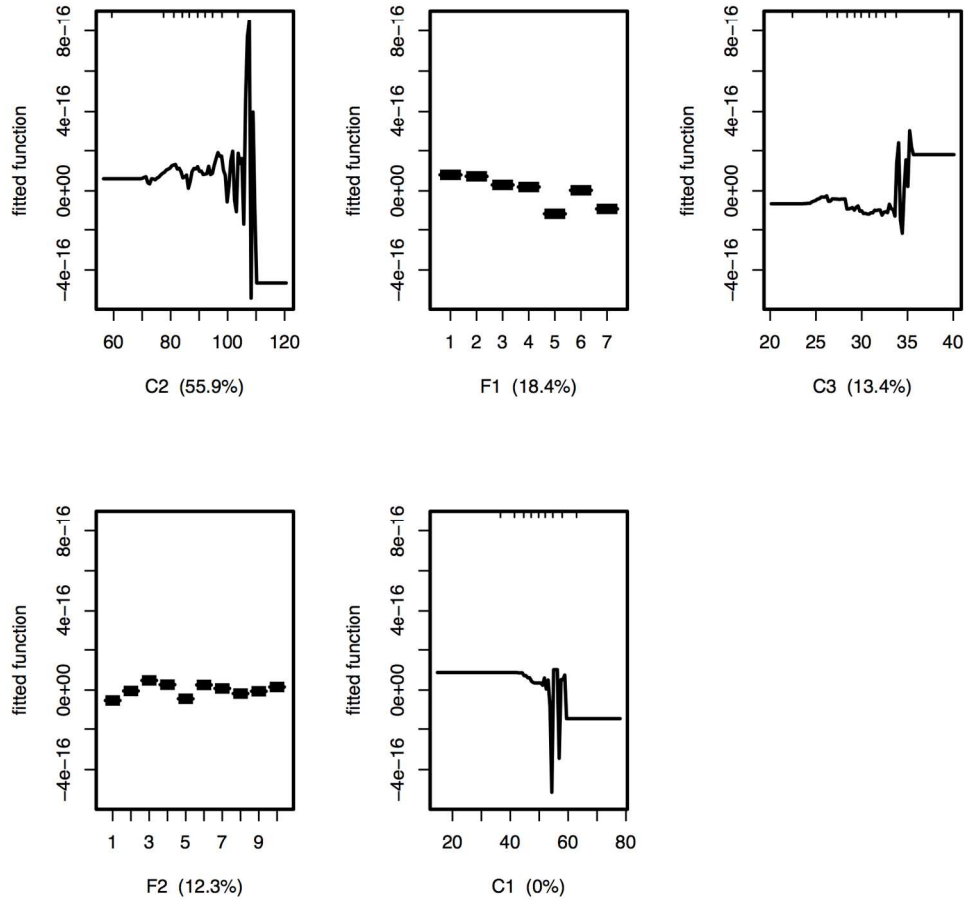

Supplementary Figure 3. Fitted function corresponding to the five variables considered in the simulation study, with the zero-point of the vertical axis indicating the model expected proportion of missingness, lines above 0.00 indicate more missingness than predicted, lines below indicate less missingness. In the top row (Part A) there is no missing data in variable C1, and in the bottom row (Part B) C1 is 50% MCAR.

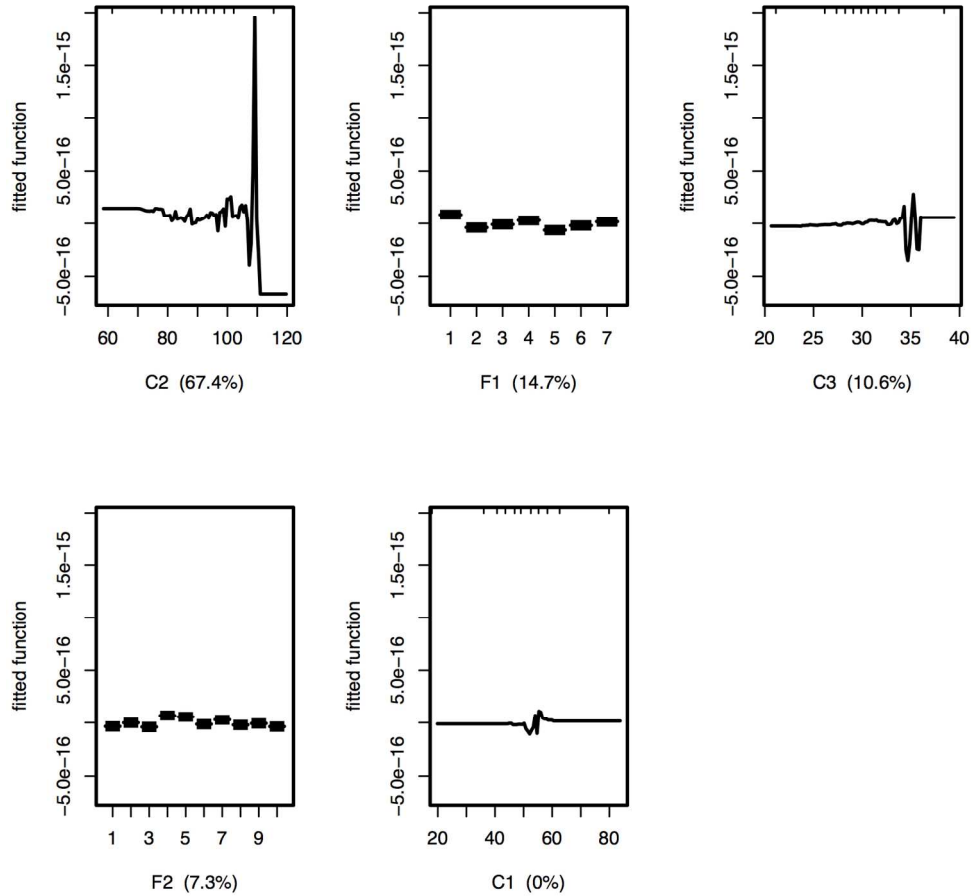

Supplementary Figure 3. Fitted function corresponding to the five variables considered in the simulation study, with the zero-point of the vertical axis indicating the model expected proportion of missingness, lines above 0.00 indicate more missingness than predicted, lines below indicate less missingness. In the top row (Part A) there is no missing data in variable C1, and in the bottom row (Part B) C1 is 50% MCAR.

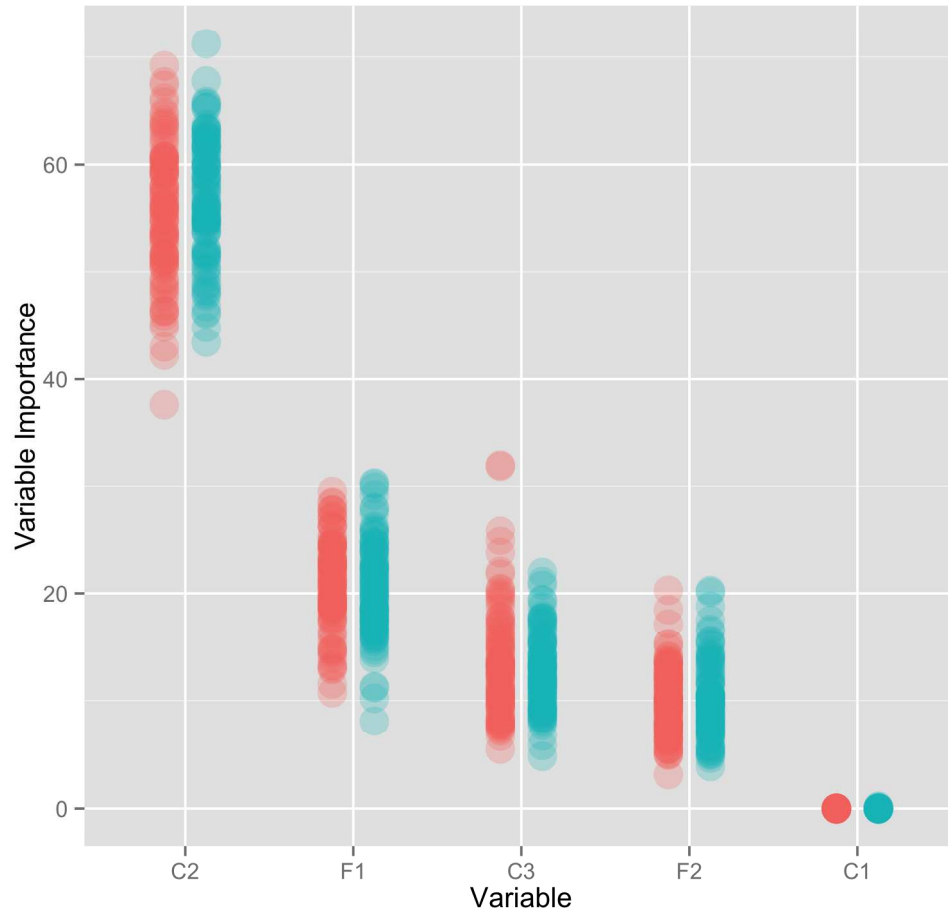

Supplementary Figure 4., Depicting the BRT model variable importance over all simulated datasets, where the red dots indicate when C1 is present, and the teal indicates when C1 is 50% MCAR.

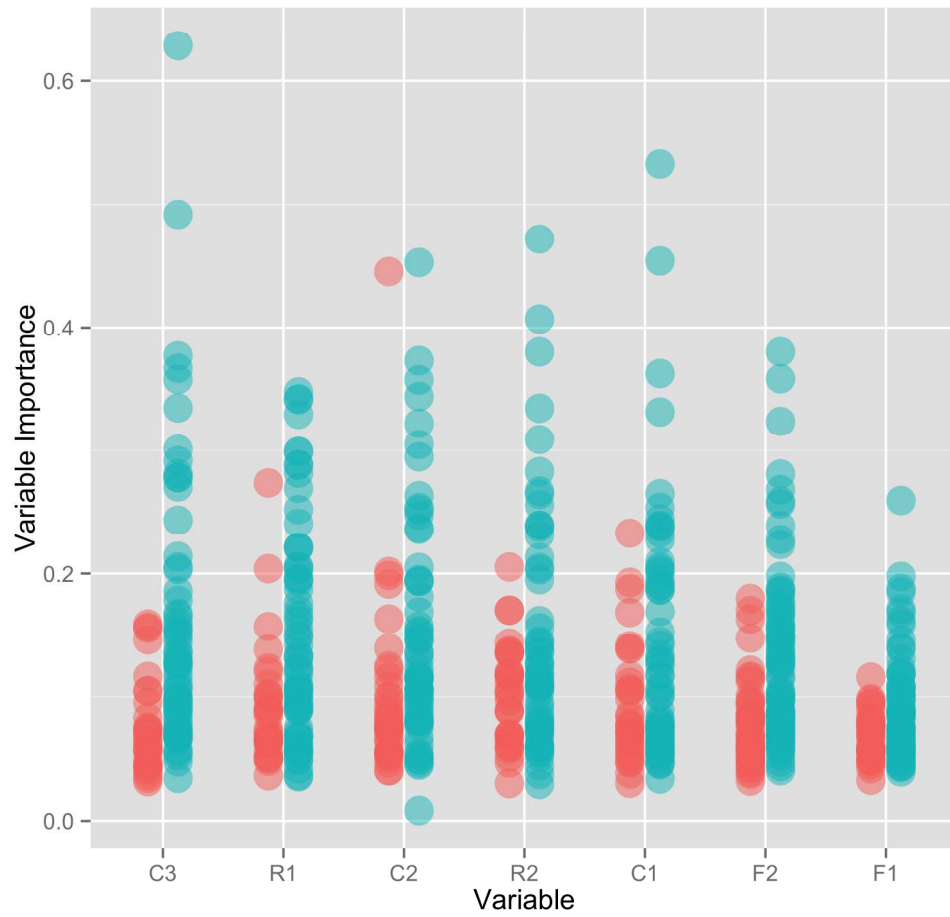

Supplementary Figure 5. Variable importance for the CART model in experiment 2, where the data is MCAR 20% (red) and MCAR 50% (blue).

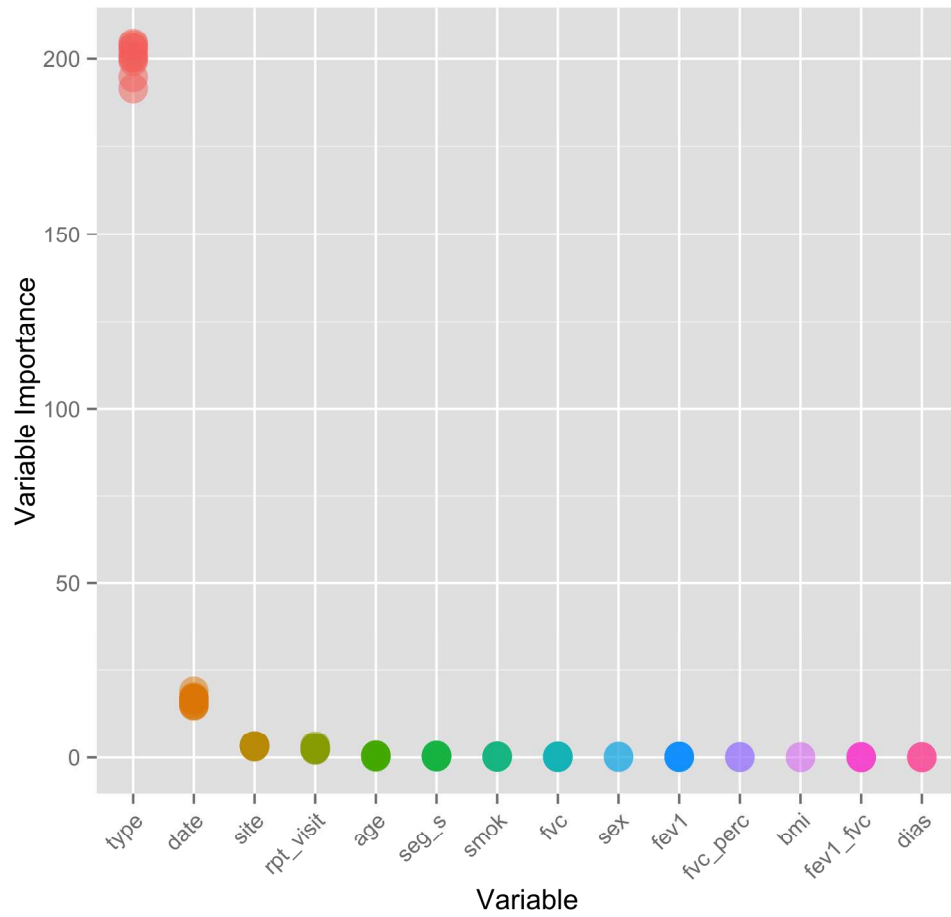

Supplementary Figure 6. Variable importance for the CART model when data is 80% resampled (with replacement), points have 50% transparency to help display duplicate values.

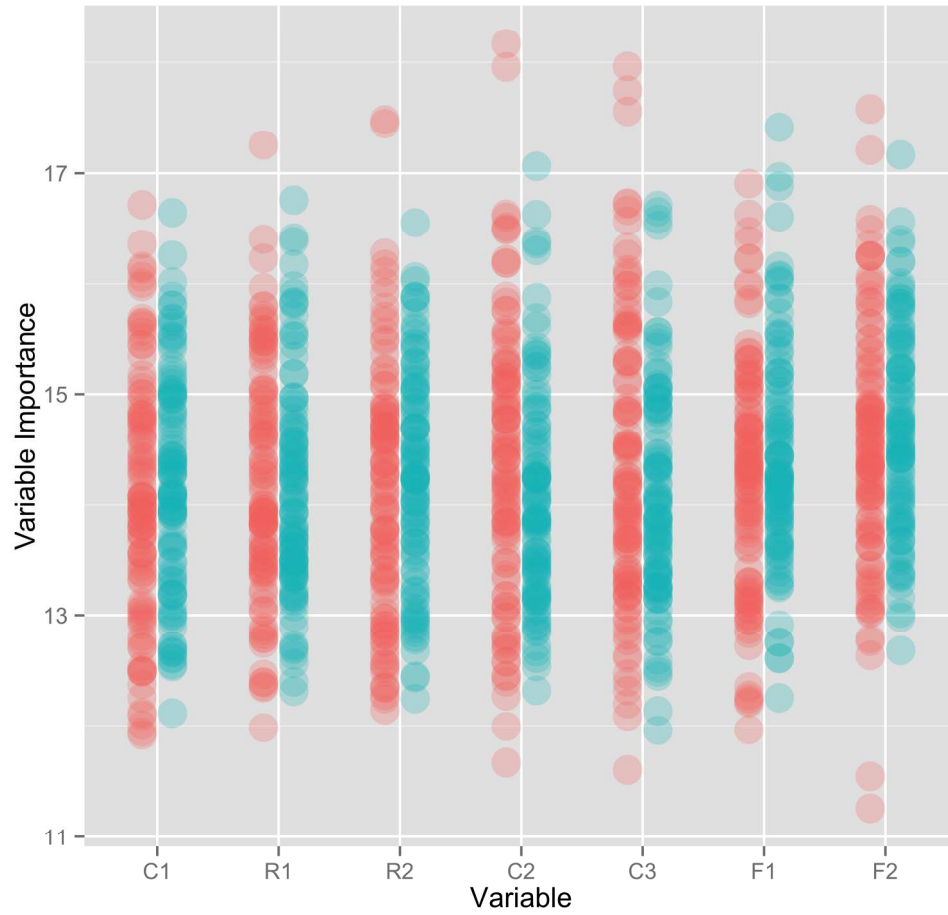

Supplementary Figure 7. Variable Importance for the BRT model, for MCAR 20% and MCAR 50%, where the red points indicate MCAR 20%, and blue indicates MCAR 50% in experiment two.



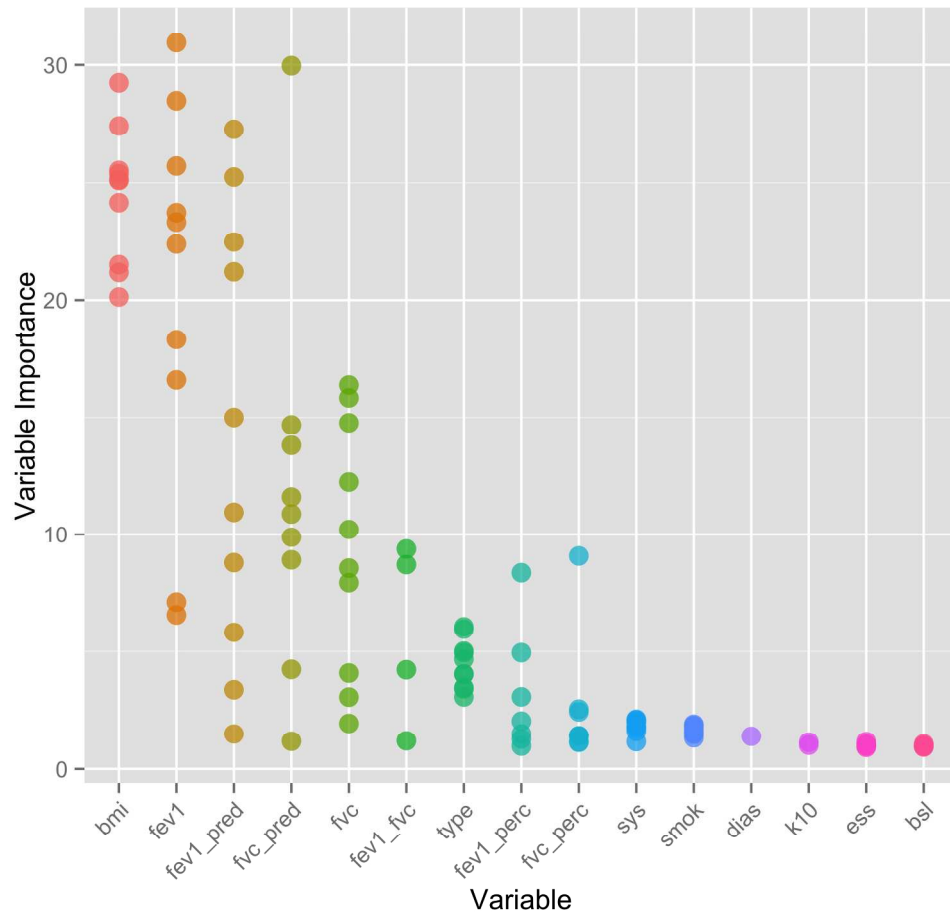

Supplementary Figure 8. Variable Importance for the BRT model, when the data is resampled 80% (with replacement).

| <b>Variable</b> | <b>Detail</b>                        |
|-----------------|--------------------------------------|
| site            | Site of work                         |
| uin             | unique identifying number            |
| sex             | gender                               |
| type            | type of data                         |
| date            | date of examination                  |
| FVC             | Forced Vital Capacity                |
| FVC%            | FVC Percent Predicted                |
| FEV1            | Forced Expiratory Volume in 1 second |
| FEV1%           | FEV1 percent predicted               |
| FEV1/FVC        | FEV1 / FVC ratio                     |
| seg_p           | Primary Similar Exposure Group       |
| seg_s           | Secondary Exposure Group             |
| Age             | Age at time of medical examination   |
| BMI             | Body Mass Index                      |
| Code            | Medical Code                         |
| sys             | Systolic blood pressure              |
| dias            | Diastolic blood pressure             |
| hdl             | High Density Lipoprotein Cholesterol |
| chol            | Total Cholesterol                    |
| CRS             | Cardiac Risk Score                   |
| smok            | Smoking Status                       |
| ess             | Epworth Sleeping Scale               |
| k10             | K10 Depression Score                 |
| etoh            | Alcohol Audit Score                  |
| BHL             | Binaural Hearing Loss                |
| rep_vis         | Number of medical Attendances        |
| ex_per_week     | Number of exercise sessions a week   |
| weight          | Weight                               |
| height          | Height                               |
| waist           | Waist Circumference                  |
| bsl             | Blood Sugar Level                    |
| pulse           | Pulse Rate (bpm)                     |
| conc            | concentration of dust                |
| laeq            | Noise                                |

Supplementary Table 1., A list of the variables used in the decision tree analysis, and their details.
